# Supplementary material
Source: Springer Nature journal article supplement (https://www.springermedizin.de/resource/supplementary/12885_2013_4337_MOESM4_ESM.pdf/9466880)

**A**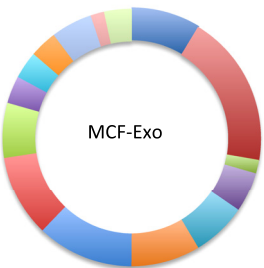

- calcium ion binding (8.6%)
- catalytic activity (18.9%)
- cell adhesion (1.7%)
- cell communication (5.1%)
- cytokinesis (6.8%)
- extracellular matrix (8.6%)
- nucleic acid binding (12.0%)
- protein binding (10.3%)
- Protein transport (6.8%)
- microtubule motor activity (3.4%)
- protein metabolic process (3.4%)
- plasma membrane receptor activity (3.4%)
- cellular defense response (5.1%)
- metabolic process (1.7%)
- microtubule motor activity (3.4%)

**B**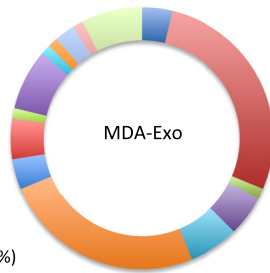

- calcium ion binding (3.6%)
- catalytic activity (26.5%)
- cell adhesion (1.2%)
- cell communication (4.8%)
- cytokinesis (6.0%)
- extracellular matrix (24%)
- nucleic acid binding (3.6%)
- protein binding (4.8%)
- Protein transport (1.2%)
- microtubule motor activity (7.2%)
- protein metabolic process (1.2%)
- plasma membrane receptor activity (1.2%)
- cellular defense response (2.4%)
- small GTPase regulator activity (1.2%)
- structural molecule activity (7.2%)

**C**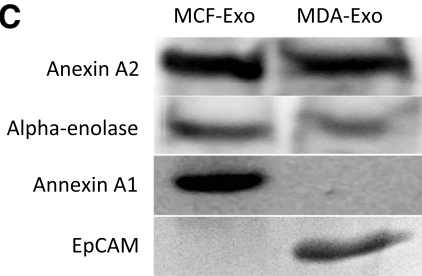

Supplement: MOESM4 [file 9466880]
